# Supplementary material for: Differential Induction of Reactive Oxygen Species and Expression of Antioxidant Enzymes in Human Melanocytes Correlate with Melanin Content: Implications on the Response to Solar UV and Melanoma Susceptibility
Source: MDPI journal article supplement (doi:10.3390/antiox11061204), 2022-06-20
Supplement: s1 [file s1]

**Supplementary Figure S1.** Solar UV-induced increase in ROS, expressed as percent of control of each of the cultures tested, based on the data presented in Fig. 3 b-e.

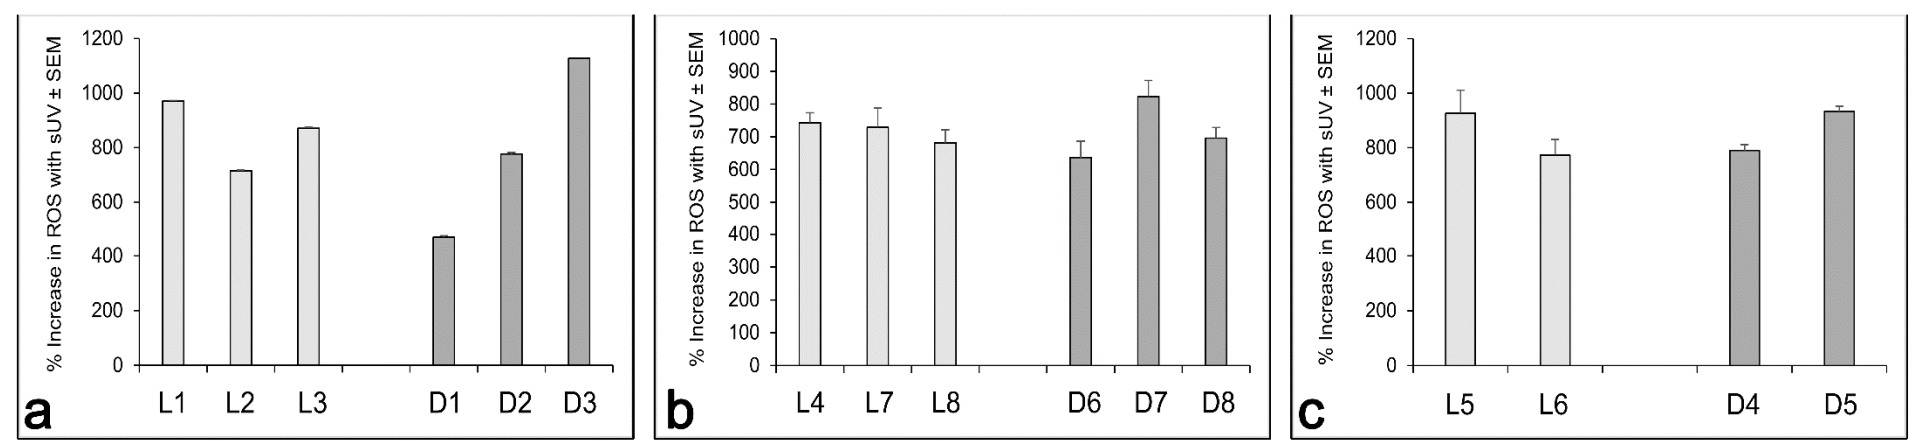

**Supplementary Figures S2 a and b.** Densitometry analysis of the Western blot data presented in Figure 4.

**Supplementary Figure S2a** Represents the densitometry of the Western blot in Fig. 4 a. Each band was normalized to its respective loading control (GAPDH or actin).

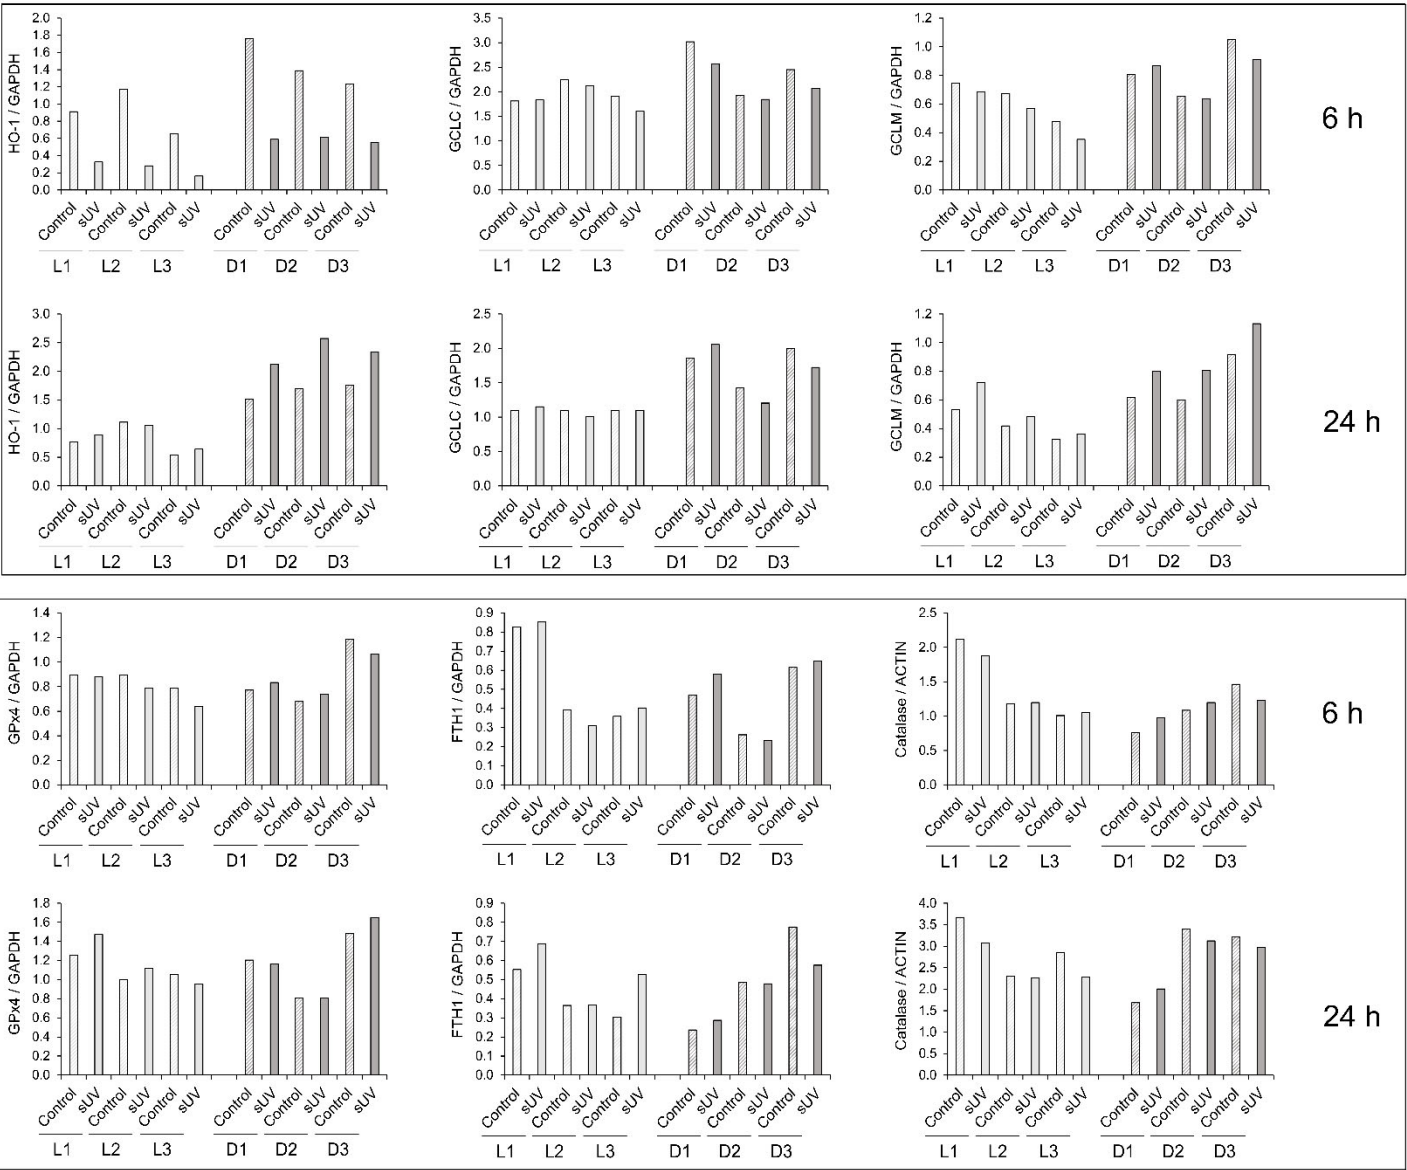

**Supplementary Figure S2 a and b.** Densitometry analysis of the Western blot data presented in Figure 4.

**Supplementary Figure S2b** Represents the densitometry of the Western blot in Fig. 4 b. Each band was normalized to its respective loading control (GAPDH or actin).

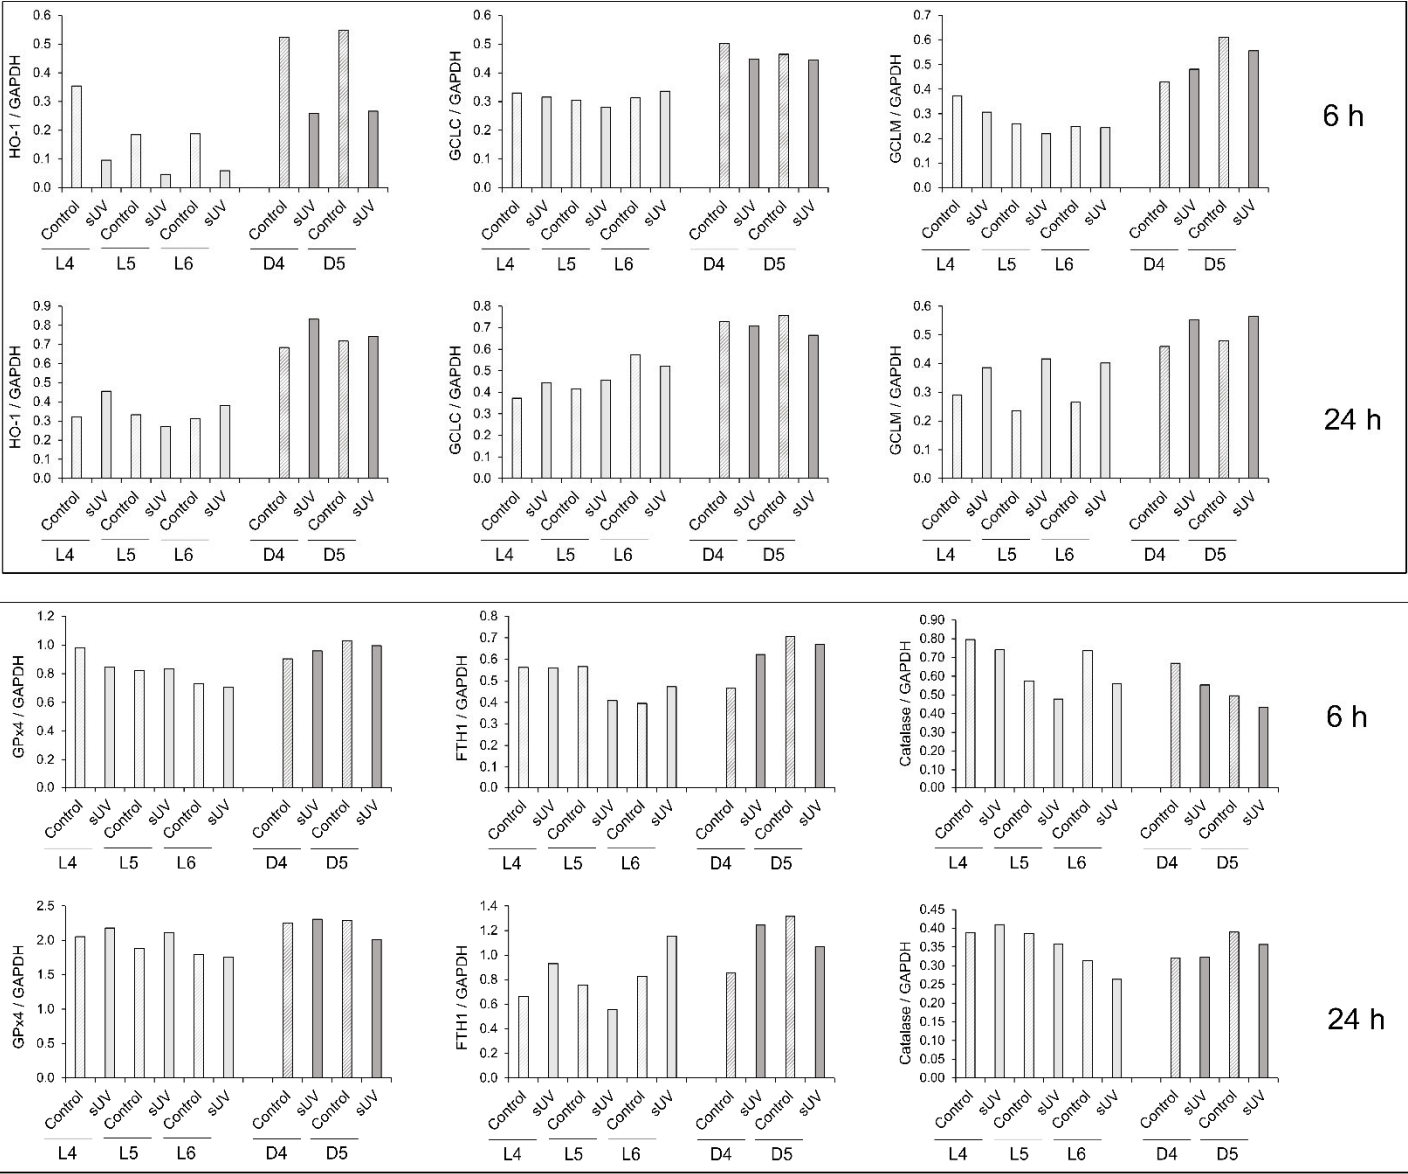

**Supplementary Figure S3 a and b.** Statistical analysis of the combined densitometry data presented in Supplementary Figure S2, representing basal levels of HO-1, GCLC, and GCLM in L versus D melanocyte cultures. Basal levels of HO-1 in (a) and (b) were statistically different in L as compared to D melanocytes at 6 h and 24 h time point. Basal levels of GCLC were statistically different in L versus D melanocytes at 6 h in (b), and at 24 h in (a) and (b). Basal levels of GCLM were statistically different in L versus D melanocytes at 6 h and 24 h in (b). \*= P<0.05; \*\*= P<0.01; \*\*\*= P<0.005; \*\*\*\*= P<0.001.

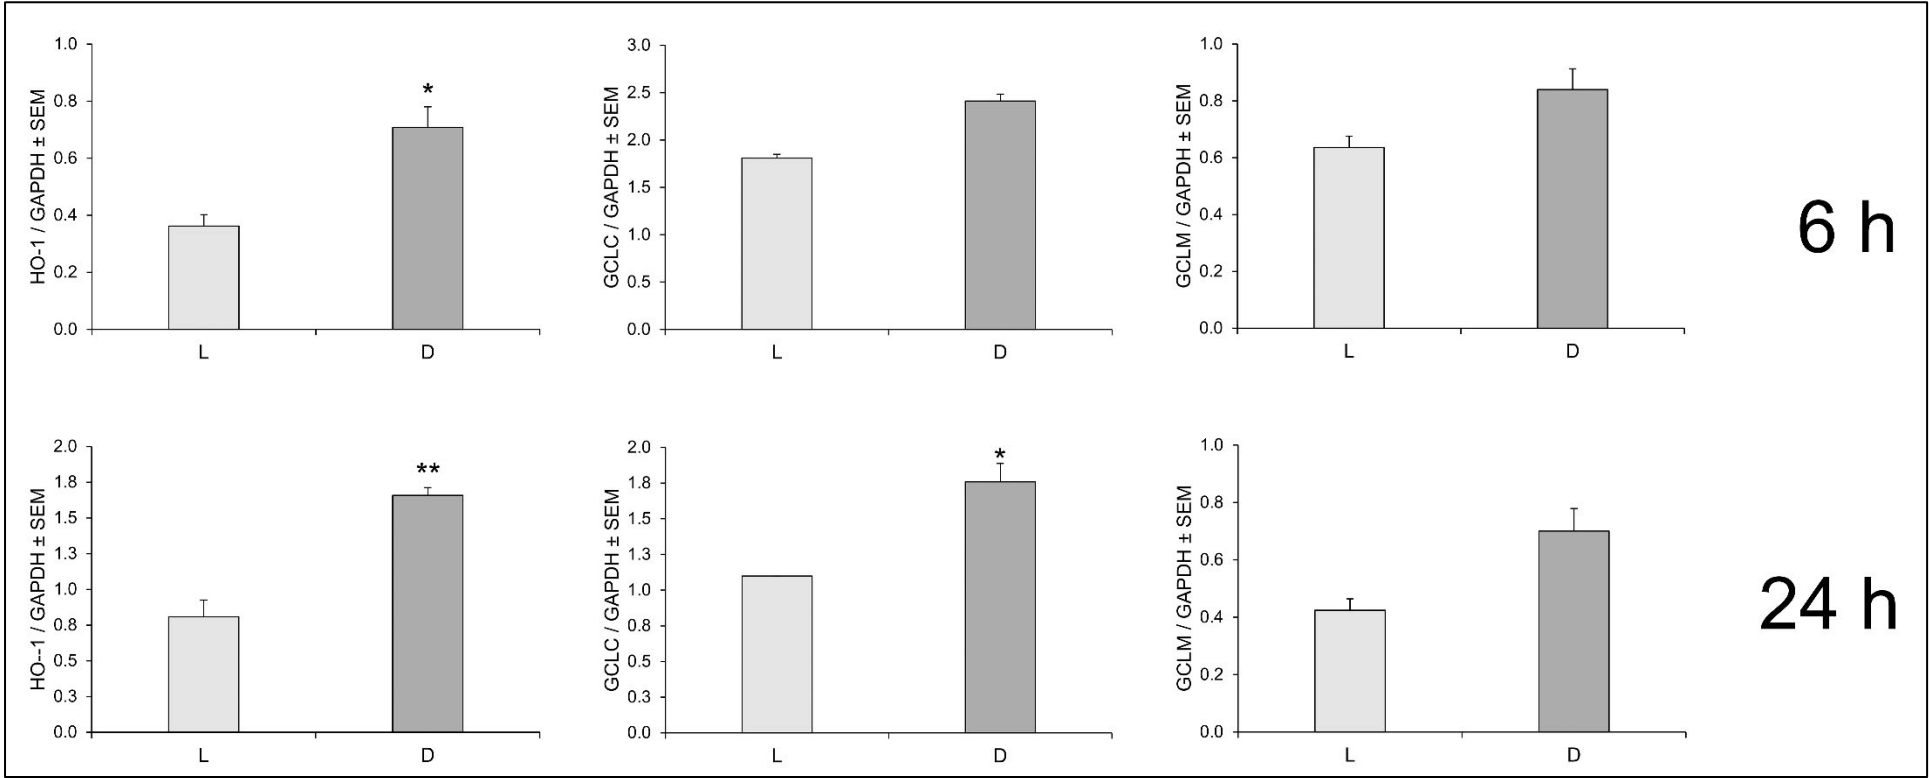

**Supplementary Figure S3 a and b.** Statistical analysis of the combined densitometry data presented in Supplementary Figure S2, representing basal levels of HO-1, GCLC, and GCLM in L versus D melanocyte cultures. Basal levels of HO-1 in (a) and (b) were statistically different in L as compared to D melanocytes at 6 h and 24 h time point. Basal levels of GCLC were statistically different in L versus D melanocytes at 6 h in (b), and at 24 h in (a) and (b). Basal levels of GCLM were statistically different in L versus D melanocytes at 6 h and 24 h in (b). \*= P<0.05; \*\*= P<0.01; \*\*\*= P<0.005; \*\*\*\*= P<0.001.

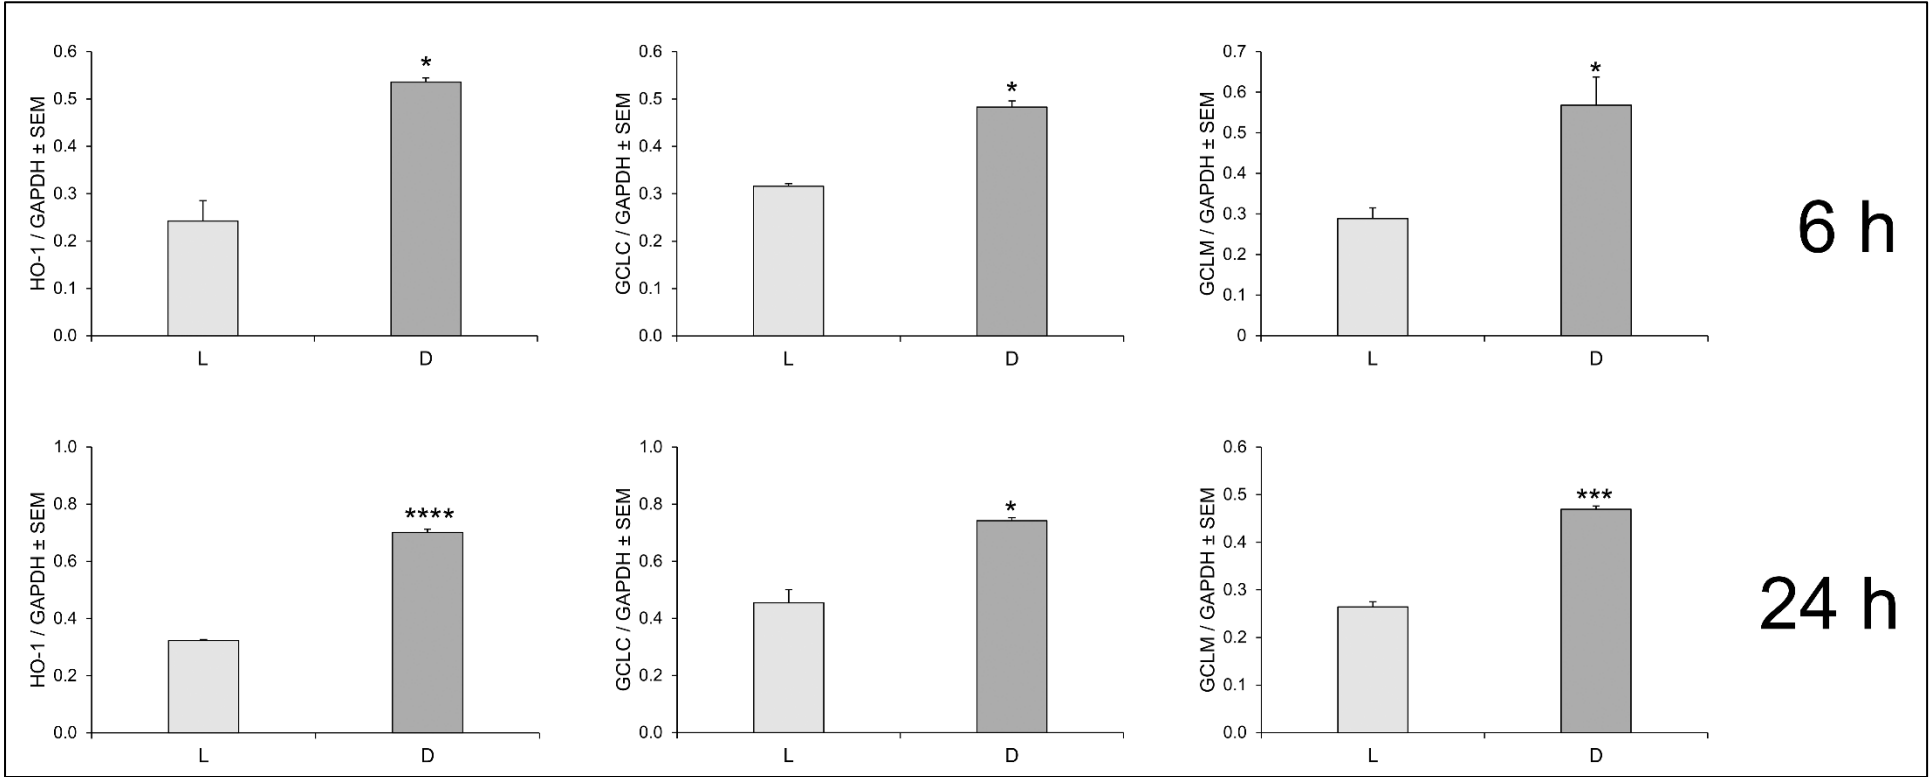

**Supplementary Figure S4 a and b.** Densitometry analysis of the Western blot data of p53, presented in Figure 6.

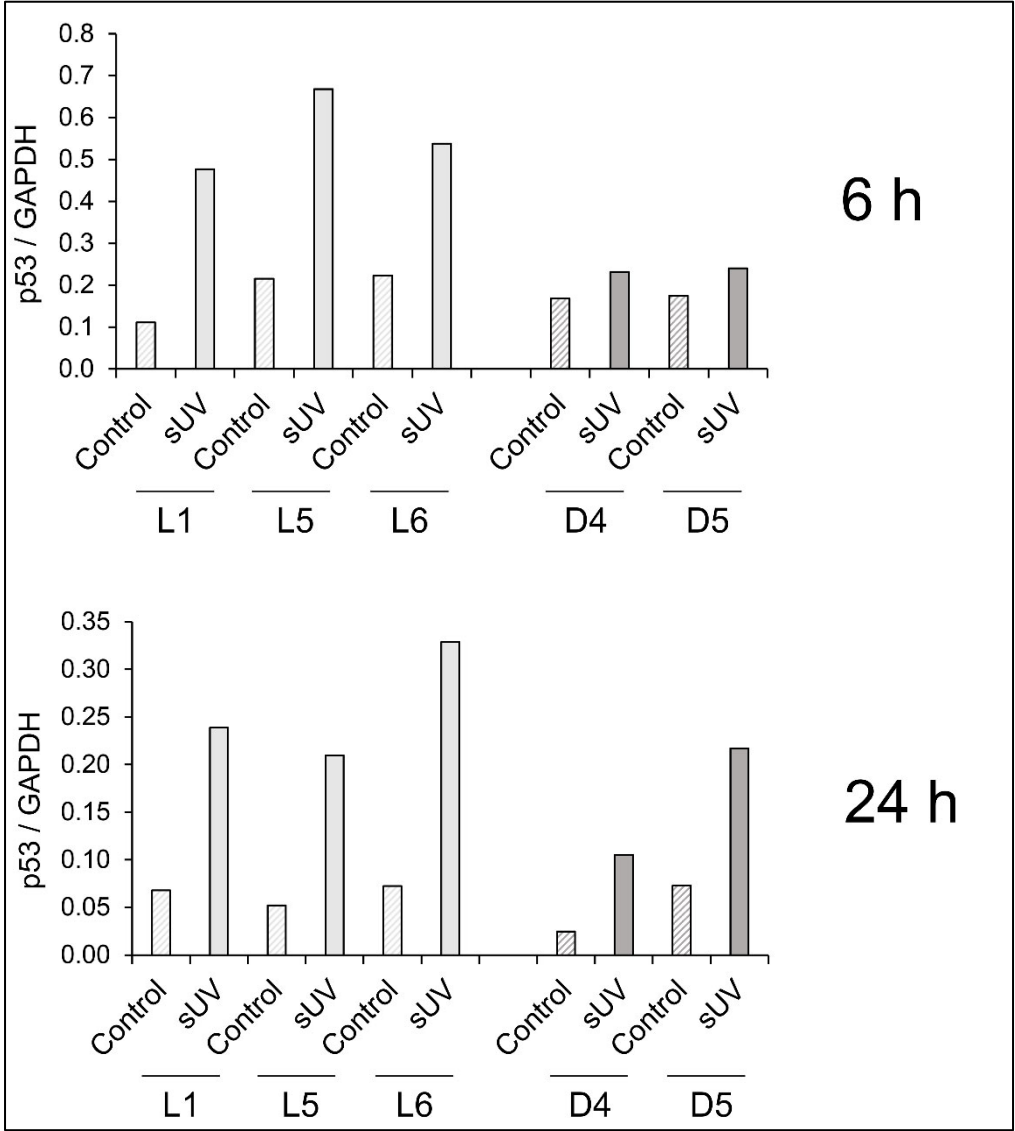

**Supplementary Figure S4 a and b.** Densitometry analysis of the Western blot data of p53, presented in Figure 6. **Supplementary Figure S4b** Represents the densitometry of the Western blot presented in Fig. 6 b, as compared to the respective GAPDH loading control.

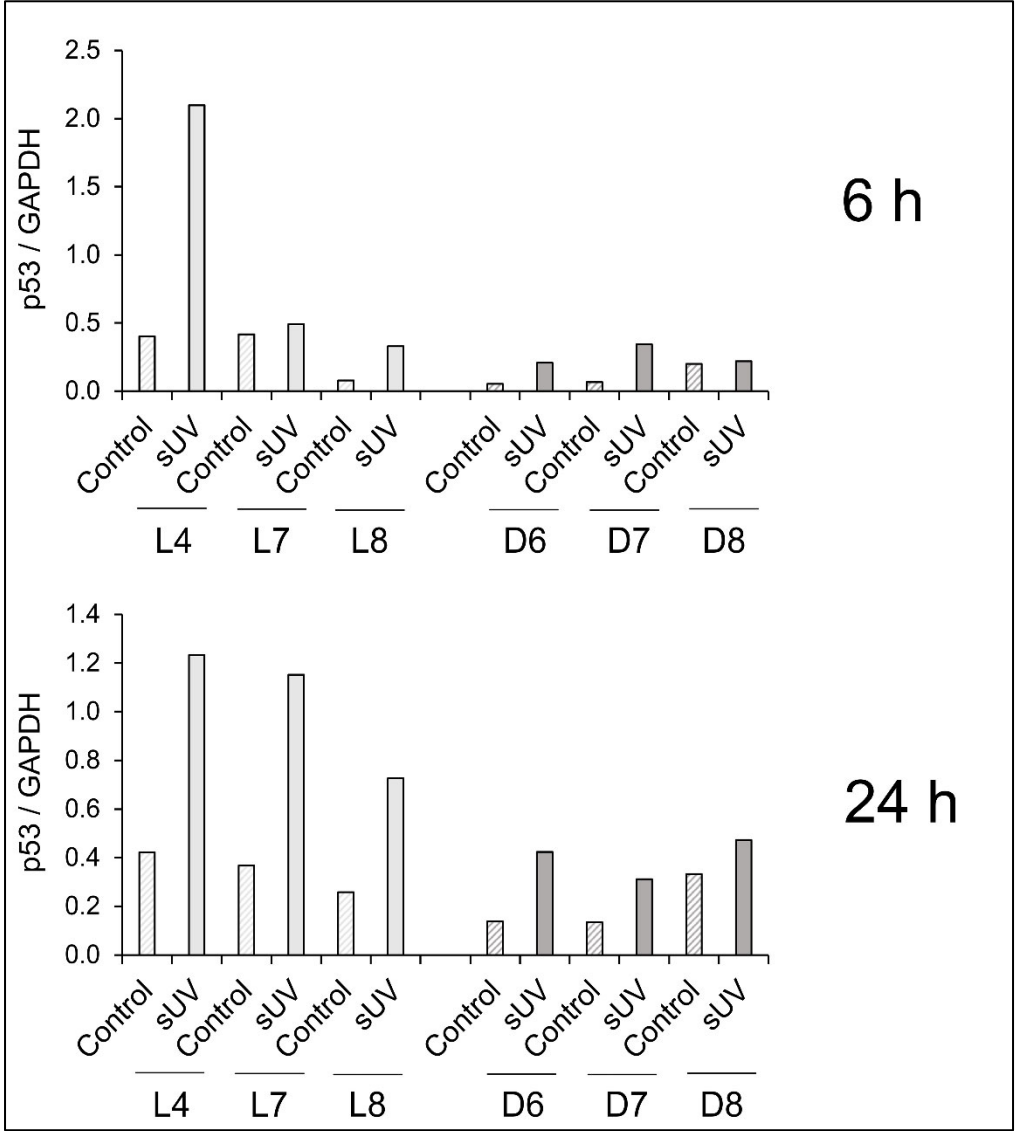

**Supplementary Figure S5 a and b.** Statistical analysis of the combined densitometry data of L versus D melanocyte cultures in Supplementary Figure S4.

Supplementary Figure S5a. Solar UV-induced p53 levels were significantly different in L vs. D melanocytes at 6 h post solar UV in (a) (\*= P<0.05).

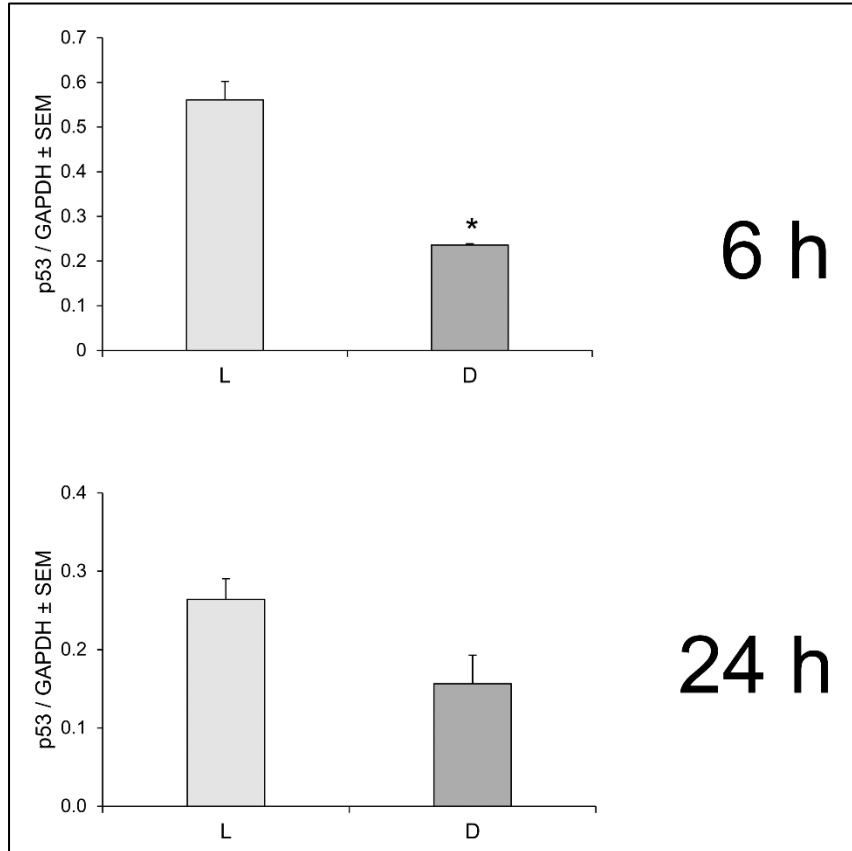



**Supplementary Figure S5 a and b.** Statistical analysis of the combined densitometry data of L versus D melanocyte cultures in Supplementary Figure S4.

Supplementary Figure S5b. Solar UV-induced p53 levels were significant different in L vs. D melanocytes at 24 h post UV in (b) (\*= $P<0.05$ ).

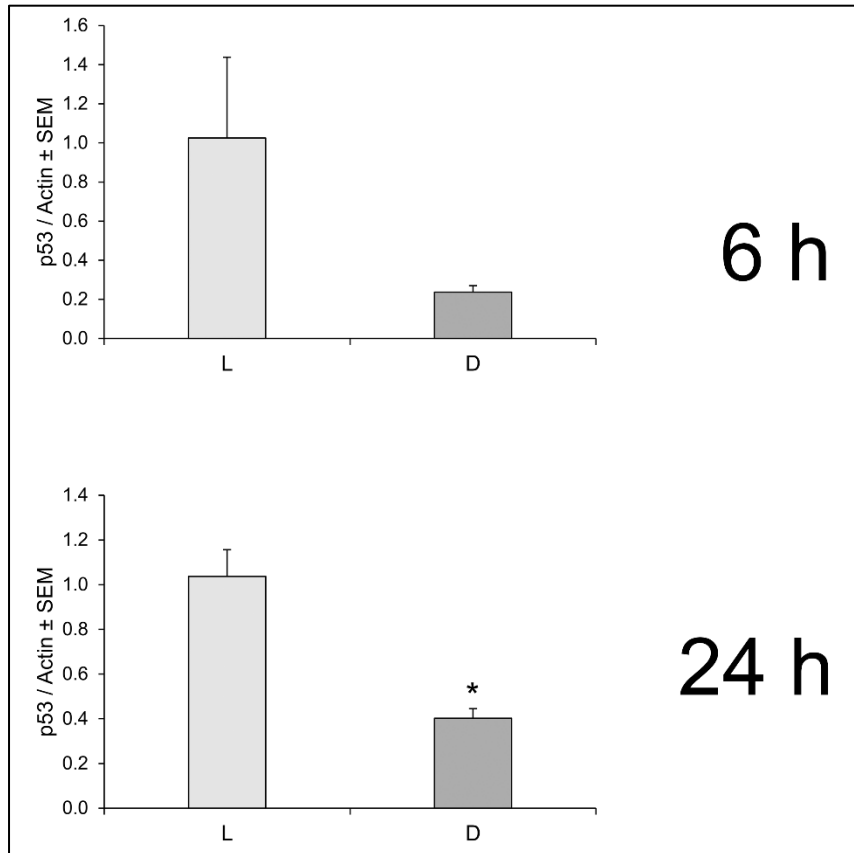

**Supplementary Table S1.** List of Primary antibodies used in Western blot experiments (Figures 4 and 6 a and b).

| <b>PROTEIN</b>   | <b>SUPPLIER</b>                                  | <b>CATALOG<br/>NUMBER</b> | <b>DILUTION</b> | <b>MOLECULAR<br/>WEIGHT<br/>(kDa)</b> |
|------------------|--------------------------------------------------|---------------------------|-----------------|---------------------------------------|
| <b>HO-1</b>      | Cell Signaling<br>Technology, Boston, MA,<br>USA | 70081                     | WB<br>1:1000    | 32                                    |
| <b>GCLC</b>      | Abcam,<br>Cambridge, MA, USA                     | ab190685                  | WB<br>1:1000    | 73                                    |
| <b>GCLM</b>      | Proteintech,<br>Rosemont, IL, USA                | 14241-1-AP                | WB<br>1:1000    | 31                                    |
| <b>SOD2</b>      | Proteintech,<br>Rosemont, IL, USA                | 24127-1-AP                | WB<br>1:4000    | 25                                    |
| <b>GPx4</b>      | Abcam,<br>Cambridge, MA, USA                     | ab125066                  | WB<br>1:5000    | 22                                    |
| <b>FTH1</b>      | Abcam,<br>Cambridge, MA, USA                     | ab65080                   | WB<br>1:1000    | 21                                    |
| <b>Catalase</b>  | Abcam,<br>Cambridge, MA, USA                     | ab209211                  | WB<br>1:2000    | 60                                    |
| <b>p53</b>       | Santa Cruz<br>Biotechnology, Dallas,<br>TX, USA  | sc-126                    | WB<br>1:500     | 53                                    |
| <b>Actin-HRP</b> | Santa Cruz<br>Biotechnology, Dallas,<br>TX, USA  | sc-1615                   | WB<br>1:1000    | 43                                    |
| <b>GAPDH-HRP</b> | Santa Cruz<br>Biotechnology, Dallas,<br>TX, USA  | sc-47724                  | WB<br>1:1000    | 37                                    |
